# Supplementary material for: Structure characterization of perfluorosulfonic short side chain polymer membranes
Source: Royal Society of Chemistry journal article supplement (doi:10.1039/c5ra11838g), 2015-01-01
Supplement: c5ra11838g1.pdf [file c5ra11838g1.pdf]

## Supplementary information

Table 3 performs some additional parameters used to process the data comparing the samples.

The coefficients  $C_i$  ( $i = 1 \dots 4$ ) in the structure factor of the model function (1), as it was mentioned above, are the values of correlations of scattering objects (channels) at several distances. 3-4 distances are needed to fit the scattering curves. The coefficient  $C_2$  has positive values and indicates the average number of channels correlating with the selected channel at the distance  $R_2$ .  $C_1$  (negative values) shows inability of individual channels to settle at a distance  $R_1$ . Neighbour channels are separated by the polymer matrix, they cannot be situated too close to each other.  $C_3$ , also negative, demonstrates existing of negative correlations of channels at larger distance  $R_3$  due to longer-range order in membranes. In some cases 3 terms in structure factor were enough, but generally we needed to introduce the 4<sup>th</sup> term with positive coefficient  $C_4$  showing correlations of channel positions at the distance  $R_4$ . In the

Table 3. Parameters of samples measured by SANS.

| Sample    | Number of layers |      | Total thickness, mm |      | Neutron transmission |       |
|-----------|------------------|------|---------------------|------|----------------------|-------|
|           | BNC              | PNPI | BNC                 | PNPI | BNC                  | PNPI  |
| SSC-1 dry | 8                | 14   | 1.56                | 2.56 | 0.803                | 0.717 |
| SSC-2 dry | 12               | 24   | 1.26                | 3.19 | 0.855                | 0.649 |
| SSC-3 dry | 8                | 7    | 1.66                | 1.64 | 0.806                | 0.818 |
| SSC-4 dry | 10               | 20   | 1.28                | 2.95 | 0.875                | 0.745 |
| SSC-1 H   | 8                | 14   | 2.06                | 3.18 | 0.497                | 0.354 |
| SSC-2 H   | 12               | 24   | 1.48                | 3.85 | 0.634                | 0.342 |
| SSC-3 H   | 8                | 7    | 1.82                | 1.99 | 0.552                | 0.566 |
| SSC-4 H   | 10               | 20   | 1.44                | 3.25 | 0.727                | 0.508 |

These numbers of parameters and conditions allowed us to achieve the perfect fitting of the complicated curve profiles.

The values of  $C_1 \dots C_3$  vs. the equivalent weight of samples are shown in fig. 9.

SANS measurements of SSC samples saturated in  $D_2O$  have also been carried out to perform the contrast variation. All samples demonstrated rather low contrast to be compared with dry and  $H_2O$ -saturated samples, as it was expected for perfluorinated membranes – scattering cross-section is much lower and ionomer peak is poorly performed, not quite enough for correct fitting. As an example, experimental data points for sample SSC-1 in three conditions are shown in fig. 10.

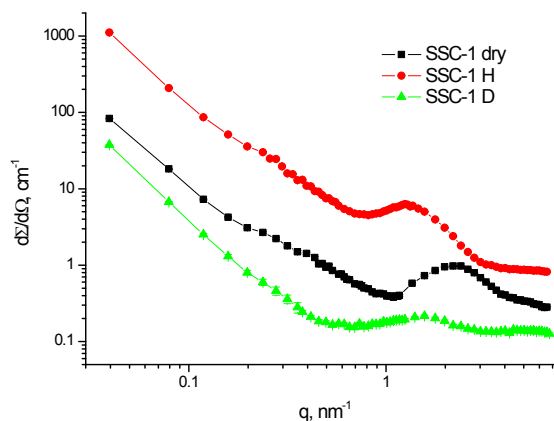

Fig. 10. Scattering cross sections of dry,  $H_2O$ -saturated (H) and  $D_2O$ -saturated (D) sample SSC-1 vs. momentum transfer.

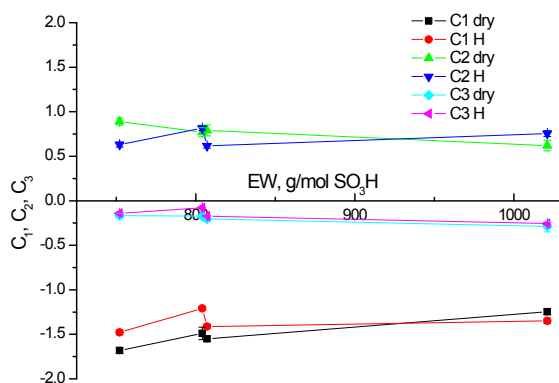

Fig. 9. Correlation coefficients  $C_1$ ,  $C_2$ ,  $C_3$  for dry and wet samples vs. equivalent weight.  $C_1$  – repulsive correlation,  $C_2$  – attractive correlation,  $C_3$  – weak/no correlation.

case this 4<sup>th</sup> term was used in fitting, it means correlations of individual channels at larger distances, or correlations of bundles (pairs) of channel.

The number of fitting parameters is too large, making the mathematical solution not evident. But we used some restrictive rules for the parameters to get the unique solution of physical task:  $1 \leq n < 3$ ;  $C_1, C_3 < 0$ ;  $C_2, C_4 > 0$ ;  $1 \text{ nm} < R_1 < R_2 < R_3 < R_4 < 100 \text{ nm}$ .
